# Supplementary material for: Environmental Neurotoxin β-N-Methylamino-L-alanine (BMAA) as a Widely Occurring Putative Pathogenic Factor in Neurodegenerative Diseases
Source: MDPI journal article supplement (doi:10.3390/microorganisms10122418), 2022-12-06
Supplement: s1 [file s1]

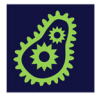

Table S1. Occurrence of BMAA and its isomers in environmental samples and organisms.

| Group of organism/sample | Type of sample, Genus                                                                          | Origin     | Additional information                                                                                                             | Reference |
|--------------------------|------------------------------------------------------------------------------------------------|------------|------------------------------------------------------------------------------------------------------------------------------------|-----------|
| Cyanobacteria            | Environmental cyanobacterial samples dominated by <i>Microcystis</i>                           | England    |                                                                                                                                    |           |
| Cyanobacteria            | Environmental cyanobacterial samples dominated by <i>Aphanizomenon</i>                         | England    |                                                                                                                                    |           |
| Cyanobacteria            | Environmental cyanobacterial samples dominated by <i>Oscillatoria</i>                          | Scotland   |                                                                                                                                    |           |
| Cyanobacteria            | Environmental cyanobacterial samples dominated by <i>Microcystis</i> and <i>Gomphosphaeria</i> | England    |                                                                                                                                    |           |
| Cyanobacteria            | Environmental cyanobacterial samples dominated by <i>Planktothrix</i>                          | Scotland   |                                                                                                                                    |           |
| Cyanobacteria            | Environmental cyanobacterial samples dominated by <i>Pseudanabaena</i>                         | Scotland   | Detected BMAA.                                                                                                                     |           |
| Cyanobacteria            | Environmental cyanobacterial samples dominated by <i>Microcystis</i>                           | Wales      | Samples of blooms, scums, and mats from 11 freshwater lakes and 1 brackish waterbody used for drinking water, recreation, or both. | [13]      |
| Cyanobacteria            | Environmental cyanobacterial samples dominated by <i>Planktothrix</i> and <i>Anabaena</i>      | Scotland   |                                                                                                                                    |           |
| Cyanobacteria            | Environmental cyanobacterial samples dominated by <i>Nodularia</i>                             | England    |                                                                                                                                    |           |
| Cyanobacteria            | Environmental cyanobacterial samples dominated by <i>Oscillatoria</i>                          | Scotland   |                                                                                                                                    |           |
| Cyanobacteria            | Environmental cyanobacterial samples dominated by <i>Aphanizomenon</i>                         | Scotland   |                                                                                                                                    |           |
| Cyanobacteria            | Environmental cyanobacterial samples dominated by <i>Anabaena</i>                              | Scotland   |                                                                                                                                    |           |
| Cyanobacteria            | Freshwater, lake Houston dominated by <i>Phormidium</i> sp.                                    | Texas, USA | Detected AEG                                                                                                                       | [26]      |

|               |                                                                                                         |                       |              |
|---------------|---------------------------------------------------------------------------------------------------------|-----------------------|--------------|
| Cyanobacteria | Freshwater, Cutler Marsh dominated by <i>Phormidium</i> sp.                                             | Utah, USA             | Detected AEG |
| Cyanobacteria | Freshwater, Logan Pond dominated by <i>Anabaenopsis</i> sp.                                             | Utah, USA             | Detected AEG |
| Cyanobacteria | Freshwater, Cutler Canyon River dominated by <i>Phormidium</i> sp., Diatoms, Green Algae                | Utah, USA             | Detected AEG |
| Cyanobacteria | Freshwater, Benson Marina dominated by <i>Oscillatoria</i> sp., <i>Phormidium</i> sp.                   | Utah, USA             | Detected AEG |
| Cyanobacteria | Freshwater, River culture 1 dominated by <i>Chroococcales</i>                                           | Mie Prefecture, Japan | Detected AEG |
| Cyanobacteria | Freshwater, River culture 2 dominated by <i>Oscillatoria</i> sp.                                        | Mie Prefecture, Japan | Detected AEG |
| Cyanobacteria | Freshwater, River culture 3 dominated by <i>Oscillatoria</i> sp.                                        | Mie Prefecture, Japan | Detected AEG |
| Cyanobacteria | Freshwater, Altan Tevsh Spring dominated by <i>Oscillatoriales/Chroococcales/Green Algae/Diatoms</i>    | Gobi Desert, Mongolia | Detected AEG |
| Cyanobacteria | Freshwater, Tsagaan Tokhoi Spring dominated by <i>Oscillatoriales/Chroococcales/Green Algae/Diatoms</i> | Gobi Desert, Mongolia | Detected AEG |
| Cyanobacteria | Freshwater, Khukh Ders Spring dominated by <i>Oscillatoriales/Green Algae</i>                           | Gobi Desert, Mongolia | Detected AEG |
| Cyanobacteria | Freshwater, Mukhar Zadgai Spring dominated by <i>Oscillatoriales/Chroococcales/Green Algae</i>          | Gobi Desert, Mongolia | Detected AEG |
| Cyanobacteria | Plankton dominated by <i>Microcystis</i> spp.                                                           | Lake Taihu, China     | Detected DAB |

[23]

|               |                                                                               |                                       |                            |      |
|---------------|-------------------------------------------------------------------------------|---------------------------------------|----------------------------|------|
| Cyanobacteria | Plankton dominated by <i>Microcystis</i> spp.                                 | Lake Chaohu, China                    | Detected DAB               |      |
| Cyanobacteria | Plankton dominated by <i>Microcystis</i> spp. and <i>Anabaena flos-aquae</i>  | Lake Hongzehu, China                  | Detected DAB               |      |
| Cyanobacteria | Lake water with cyanobacterial blooms                                         | Montréal, Canada                      | Detected BMAA, DAB and AEG |      |
| Cyanobacteria | Lake water with cyanobacterial blooms                                         | Estrie, Canada                        | Detected BMAA, DAB and AEG | [43] |
| Cyanobacteria | Lake water with cyanobacterial blooms                                         | Abitibi Témiscamingue, Canada         | Detected BMAA and DAB      |      |
| Cyanobacteria | Lake water with cyanobacterial blooms                                         | Saguenay, Canada                      | Detected BMAA, DAB and AEG |      |
| Cyanobacteria | Cyanobacterial bloom dominated by <i>Microcystis</i>                          | Gonghu Bay, Lake Taihu, China         | Detected BMAA              | [34] |
| Cyanobacteria | Phytoplankton of springs dominated by <i>Anabaena</i> sp.                     | Gobi Desert, Mongolia                 | Detected BMAA and DAB      | [24] |
| Cyanobacteria | Marine water, Coastal culture dominated by <i>Oscillatoria</i> sp.            | Mie Prefecture, Japan                 | Detected AEG               |      |
| Cyanobacteria | Marine water, the Inland Sea dominated by <i>Lyngbia</i> sp.                  | Qatar                                 | Detected AEG               | [26] |
| Cyanobacteria | Marine water, Biscayne Bay dominated by <i>Lyngbia</i> sp.                    | Florida, USA                          | Detected AEG               |      |
| Cyanobacteria | Plankton samples dominated by cyanobacteria                                   | Askö, Baltic Sea (outside the island) | Detected BMAA              | [9]  |
| Cyanobacteria | Plankton samples dominated by cyanobacteria                                   | Baltic Sea (open water)               | Detected BMAA              |      |
| Cyanobacteria | Plankton dominated by <i>Nodularia spumigena</i> and <i>Aphanizomenon</i> sp. | Baltic Sea, Sweden                    | Detected BMAA and DAB      | [27] |

|               |                                                                                   |                             |                       |      |
|---------------|-----------------------------------------------------------------------------------|-----------------------------|-----------------------|------|
| Cyanobacteria | Cyanobacterial scum from urban water dominated by <i>Anabaena</i> sp.             | Nijmegen, Netherlands       | Detected BMAA         |      |
| Cyanobacteria | Cyanobacterial scum from urban water dominated by <i>Planktothrix agardhii</i>    | Bergen-op-Zoom, Netherlands | Detected BMAA         |      |
| Cyanobacteria | Cyanobacterial scum from urban water dominated by <i>Microcystis aeruginosa</i>   | Schijndel, Netherlands      | Detected BMAA         |      |
| Cyanobacteria | Cyanobacterial scum from urban water dominated by <i>Microcystis aeruginosa</i>   | Etten Leur, Netherlands     | Detected BMAA         |      |
| Cyanobacteria | Cyanobacterial scum from urban water dominated by <i>Anabaena</i>                 | Budel, Netherlands          | Detected BMAA         |      |
| Cyanobacteria | Cyanobacterial scum from urban water dominated by <i>Aphanizomenon flos-aquae</i> | St-Oedenrode 1, Netherlands | Detected BMAA         | [25] |
| Cyanobacteria | Cyanobacterial scum from urban water dominated by <i>Planktothrix agardhii</i>    | St-Oedenrode 2, Netherlands | Detected BMAA         |      |
| Cyanobacteria | Cyanobacterial scum from urban water dominated by <i>Planktothrix agardhii</i>    | Tilburg 1, Netherlands      | Detected BMAA and DAB |      |
| Cyanobacteria | Cyanobacterial scum from urban water dominated by <i>Woronichinia naegeliana</i>  | Arnhem, Netherlands         | Detected DAB          |      |
| Cyanobacteria | Cyanobacterial scum from urban water dominated by <i>Microcystis aeruginosa</i>   | Beek en Donk, Netherlands   | Detected BMAA         |      |
| Cyanobacteria | Cyanobacterial scum dominated by <i>Anabaena</i>                                  | Lake, Netherlands           | Detected BMAA         |      |
| Cyanobacteria | Cyanobacterial scum dominated by <i>Planktothrix rubescens</i>                    | Lake, Netherlands           | Detected BMAA         | [28] |

|               |                                 |                                      |                                                                                    |      |
|---------------|---------------------------------|--------------------------------------|------------------------------------------------------------------------------------|------|
| Cyanobacteria | Cyanobacterial mats             | East Antarctica                      | Detected BMAA in 1 sample, DAB in 6 samples, AEG in 6 samples. Analyzed 7 samples. | [39] |
| Cyanobacteria | Lagoon periphyton               | Thau lagoon, France                  | Detected BMAA, DAB and AEG                                                         | [10] |
| Cyanobacteria | Lagoon seston                   | Thau lagoon, France                  | Detected BMAA and DAB                                                              |      |
| Phytoplankton | Phytoplankton of the Baltic Sea | Landsort Deep, Baltic Sea (open sea) | Detected BMAA                                                                      | [44] |
| Water         | Eutroficated lake water         | Lake Finjasjön, Sweden               | Detected BMAA                                                                      | [40] |
| Water         | Lake water                      | Lake Winnipeg, Canada                | Detected BMAA                                                                      | [42] |
| Water         | Surface water                   | Buffalo Pound Lake, Canada           | Detected BMAA                                                                      | [37] |
| Water         | Surface water                   | Conestogo Lake, Canada               | Detected BMAA                                                                      |      |
| Water         | Surface water                   | Lac Saint-Augustin, Canada           | Detected BMAA                                                                      |      |
| Water         | Surface water                   | Petit lac Saint-François, Canada     | Detected BMAA                                                                      |      |
| Water         | Surface water                   | Woolwich Reservoir, Canada           | Detected BMAA                                                                      |      |
| Water         | Water from reservoirs           | Holmes reservoir, Nebraska           | Detected BMAA and DAB                                                              | [38] |
| Water         | Water from reservoirs           | Pawnee reservoir, Nebraska           | Detected BMAA and DAB                                                              |      |
| Water         | Water from reservoirs           | Rockford reservoir, Nebraska         | Detected BMAA and DAB                                                              |      |
| Water         | Water from reservoirs           | Kirkman's Cove reservoir, Nebraska   | Detected BMAA and DAB                                                              |      |
| Water         | Water from reservoirs           | Swan Creek reservoir, Nebraska       | Detected BMAA and DAB                                                              |      |
| Water         | Water from reservoirs           | Willow Creek reservoir, Nebraska     | Detected BMAA and DAB                                                              |      |
| Water         | Water from reservoirs           | Bluestem reservoir, Nebraska         | Detected DAB                                                                       |      |

|               |                                              |                                |                                                                  |      |
|---------------|----------------------------------------------|--------------------------------|------------------------------------------------------------------|------|
| Cyanobacteria | <i>Anabaena</i> sp. FACHB-1180               | Lake Chaohu, China             | Detected DAB in culture                                          | [23] |
| Cyanobacteria | <i>Anabaena</i> PCC 7120                     | USA                            | Detected BMAA in culture. N.A habitat                            | [11] |
| Cyanobacteria | <i>Anabaena</i> sp. PCC 73105                | Cambridge, UK                  | Detected AEG in axenic culture. Isolated from freshwater habitat | [26] |
| Cyanobacteria | <i>Anabaena variabilis</i> ATCC 29413        | USA                            | Detected BMAA in culture. Isolated from freshwater habitat       | [11] |
| Cyanobacteria | <i>Anabaena flos-aquae</i> SAG30.87          | Canada                         | Detected DAB in culture                                          | [14] |
| Cyanobacteria | <i>Aphanizomenon flos-aquae</i> CCAP 1401/7  | N. A                           | Detected BMAA in culture                                         | [28] |
| Cyanobacteria | <i>Aphanizomenon flos-aquae</i>              | Baltic Sea                     | Detected BMAA in culture. Isolated from marine habitat           | [11] |
| Cyanobacteria | <i>Aphanizomenon flos-aquae</i> FACHB-1249   | Lake Chaohu, China             | Detected DAB in culture                                          | [23] |
| Cyanobacteria | <i>Aphanizomenon flos-aquae</i> FACHB-1290   | Dianchi, China                 | Detected DAB in culture                                          |      |
| Cyanobacteria | <i>Calothrix</i> sp. FACHB-154               | Changde, China                 | Detected DAB in culture                                          |      |
| Cyanobacteria | <i>Calothrix</i> sp. FACHB-167               | Wuchang, China                 | Detected DAB in culture                                          | [11] |
| Cyanobacteria | <i>Calothrix</i> PCC 7103                    | N. A                           | Detected BMAA in culture. N.A habitat                            |      |
| Cyanobacteria | <i>Calothrix crustacea</i> CCAP1410/9        | N. A                           | Detected DAB in cultures                                         | [29] |
| Cyanobacteria | <i>Chlorogloeopsis</i> PCC 6912              | India                          | Detected BMAA in culture. Isolated from soil habitat             | [11] |
| Cyanobacteria | <i>Chroococcidiopsis</i> sp. PCC 6712        | California, USA                | Detected AEG in axenic culture. Isolated from freshwater habitat | [26] |
| Cyanobacteria | <i>Chroococcidiopsis indica</i> GQ2-7        | N. A                           | Detected BMAA in culture. Isolated from marine coral habitat     | [11] |
| Cyanobacteria | <i>Chroococcidiopsis indica</i> GT-3-26      | N. A                           | Detected BMAA in culture. Isolated from marine rock habitat      |      |
| Cyanobacteria | <i>Cyanobium</i> sp.                         | River estuarie, Portugal       | Detected BMAA in culture                                         | [30] |
| Cyanobacteria | <i>Cyanobium</i> sp. LEGE06068               | River estuarie Douro, Portugal | Detected BMAA in culture                                         | [31] |
| Cyanobacteria | <i>Cylindrospermopsis raciborskii</i> ITEP18 | Brazil                         | Detected DAB in culture                                          | [14] |

|               |                                                    |                                 |                                                                 |      |
|---------------|----------------------------------------------------|---------------------------------|-----------------------------------------------------------------|------|
| Cyanobacteria | <i>Cylindrospermopsis raciborskii</i> CR3          | Australia                       | Detected BMAA in culture. Isolated from freshwater habitat      | [11] |
| Cyanobacteria | <i>Fischerella</i> sp. PCC 7521                    | Yellowstone, USA                | Detected AEG in axenic culture. Isolated from hot spring.       | [26] |
| Cyanobacteria | <i>Fischerella</i> PCC 7521                        | Yellowstone, USA                | Detected BMAA in culture. Isolated from Yellowstone, hot spring | [11] |
| Cyanobacteria | <i>Lyngbia</i> sp. PCC 8106                        | North Sea, Germany              | Detected AEG in axenic culture. Isolated from marine habitat    | [26] |
| Cyanobacteria | <i>Lyngbia majuscula</i>                           | Zanzibar                        | Detected BMAA in culture. Isolated from marine habitat          | [11] |
| Cyanobacteria | <i>Lyngbia maiussula</i> Harv FACHB-866            | Chengdu, China                  | Detected DAB in culture                                         | [23] |
| Cyanobacteria | <i>Lyngbia cryptovaginitus</i> FACHB-890           | China                           | Detected DAB in culture                                         |      |
| Cyanobacteria | <i>Leptolyngbia</i> PCC 73110                      | N. A                            | Detected BMAA and DAB in culture                                | [27] |
| Cyanobacteria | <i>Leptolyngbia</i> PCC 73110                      | N. A                            | Detected BMAA and AEG in culture                                | [32] |
| Cyanobacteria | <i>Leptolyngbia</i> PCC 73110                      | N. A                            | Detected DAB in culture                                         | [29] |
| Cyanobacteria | <i>Leptolyngbia</i> sp.                            | River estuarie, Portugal        | Detected BMAA in culture                                        | [30] |
| Cyanobacteria | <i>Leptolyngbia</i> sp. 1 LEGE06069                | River estuarie Douro, Portugal  | Detected BMAA in culture                                        | [31] |
| Cyanobacteria | <i>Leptolyngbia</i> sp. 1 LEGE07080                | River estuarie Minho, Portugal  | Detected BMAA in culture                                        |      |
| Cyanobacteria | <i>Leptolyngbia</i> sp. 1 LEGE07084                | River estuarie Minho, Portugal  | Detected BMAA in culture                                        |      |
| Cyanobacteria | <i>Leptolyngbia</i> sp. 1 LEGE07091                | River estuaries Vouga, Portugal | Detected BMAA in culture                                        |      |
| Cyanobacteria | <i>Leptolyngbia</i> sp. 2 LEGE06070                | River estuarie Douro, Portugal  | Detected BMAA in culture                                        |      |
| Cyanobacteria | <i>Leptolyngbia</i> sp. 2 LEGE 07075               | River estuarie Douro, Portugal  | Detected BMAA in culture                                        |      |
| Cyanobacteria | <i>Leptolyngbia</i> aff. <i>bijugata</i> LEGE07085 | River estuarie Douro, Portugal  | Detected BMAA in culture                                        |      |
| Cyanobacteria | <i>Microcoleus</i> sp.                             | River estuarie, Portugal        | Detected BMAA in culture                                        | [30] |

|               |                                             |                                |                                                                                                                                                      |      |
|---------------|---------------------------------------------|--------------------------------|------------------------------------------------------------------------------------------------------------------------------------------------------|------|
| Cyanobacteria | <i>Microcoleus vaginatus</i> LEGE07076      | River estuarie Minho, Portugal | Detected BMAA in culture                                                                                                                             | [31] |
| Cyanobacteria | <i>Microcoleus chthonoplastes</i> LEGE07092 | River estuarie Vouga, Portugal | Detected BMAA in culture                                                                                                                             |      |
| Cyanobacteria | <i>Microcystis</i> PCC 7806                 | The Netherlands                | Detected BMAA in culture. Isolated from freshwater habitat                                                                                           | [11] |
| Cyanobacteria | <i>Microcystis</i> PCC 7820                 | Scotland                       | Detected BMAA in culture. Isolated from freshwater habitat                                                                                           |      |
| Cyanobacteria | <i>Microcystis aeruginosa</i> AB2005/26     | China, Lake Chaohu             | Detected DAB in culture                                                                                                                              | [14] |
| Cyanobacteria | <i>Microcystis aeruginosa</i> AB2005/28     | China, Lake Chaohu             | Detected DAB in culture                                                                                                                              |      |
| Cyanobacteria | <i>Microcystis aeruginosa</i> AB2005/30     | China, Lake Chaohu             | Detected DAB in culture                                                                                                                              |      |
| Cyanobacteria | <i>Microcystis aeruginosa</i> AB2005/31     | China, Lake Chaohu             | Detected DAB in culture                                                                                                                              |      |
| Cyanobacteria | <i>Microcystis aeruginosa</i> AB2005/32     | China, Lake Chaohu             | Detected DAB in culture                                                                                                                              |      |
| Cyanobacteria | <i>Microcystis aeruginosa</i> AB2005/33     | China, Lake Chaohu             | Detected DAB in culture                                                                                                                              |      |
| Cyanobacteria | <i>Microcystis aeruginosa</i> AB2005/40     | China, Lake Chaohu             | Detected DAB in culture                                                                                                                              |      |
| Cyanobacteria | <i>Microcystis aeruginosa</i> AB2005/45     | China, Lake Chaohu             | Detected DAB in culture                                                                                                                              |      |
| Cyanobacteria | <i>Microcystis aeruginosa</i> AB2005/46     | China, Lake Chaohu             | Detected DAB in culture                                                                                                                              |      |
| Cyanobacteria | <i>Microcystis aeruginosa</i> Terramare     | Germany                        | Detected DAB in culture                                                                                                                              | [23] |
| Cyanobacteria | <i>Microcystis aeruginosa</i> FACHB-315     | N. A                           | Detected DAB in culture. Strain purchased from the freshwater algae collection in the Institute of Hydrobiology (FACHB), Chinese Academy of Sciences |      |
| Cyanobacteria | <i>Microcystis aeruginosa</i> FACHB-905     | N. A                           | Detected DAB in culture. Strain purchased from the freshwater algae collection in the Institute of Hydrobiology (FACHB), Chinese Academy of Sciences | [35] |
| Cyanobacteria | <i>Myxosarcina</i> sp. LEGE 06146           | Portugal                       | Detected BMAA in culture. Isolated from marine habitat                                                                                               |      |
| Cyanobacteria | <i>Myxosarcina burmensis</i> GB-9-4         | Marshall Islands, USA          | Detected BMAA in culture. Isolated from marine coral habitat                                                                                         | [11] |
| Cyanobacteria | <i>Myxosarcina concinna</i> GT-7-6          | N. A                           | Detected BMAA in culture. Isolated from marine coral habitat                                                                                         |      |



|               |                              |                    |                                                                                                                                                       |      |
|---------------|------------------------------|--------------------|-------------------------------------------------------------------------------------------------------------------------------------------------------|------|
| Cyanobacteria | <i>Nostoc</i> sp. LEGE 06077 | Portugal           | Detected BMAA in culture. Isolated from estuarine habitat                                                                                             | [35] |
| Cyanobacteria | <i>Nostoc</i> sp. PCC 7120   | N. A               | Detected AEG in axenic culture                                                                                                                        | [26] |
| Cyanobacteria | <i>Nostoc</i> PCC 9305       | N. A               | Detected BMAA in culture. Isolated from symbiosis with <i>Anthoceros</i>                                                                              | [11] |
| Cyanobacteria | <i>Nostoc</i> PCC 7422       | N. A               | Detected BMAA in culture. Isolated from symbiosis with <i>Cycas</i>                                                                                   |      |
| Cyanobacteria | <i>Nostoc</i> PCC 9229       | N. A               | Detected BMAA in culture. Isolated from symbiosis with <i>Gunnera monoica</i>                                                                         |      |
| Cyanobacteria | <i>Nostoc</i> PCC 6310       | Israel             | Detected BMAA in culture. Isolated from freshwater habitat                                                                                            |      |
| Cyanobacteria | <i>Nostoc</i> PCC 7107       | USA                | Detected BMAA in culture. Isolated from freshwater habitat                                                                                            |      |
| Cyanobacteria | <i>Nostoc</i> Pc             | N. A               | Detected BMAA in culture. Isolated from symbiosis with <i>Peltigera</i>                                                                               | [29] |
| Cyanobacteria | <i>Nostoc</i> PCC 7107       | N. A               | Detected DAB in culture                                                                                                                               |      |
| Cyanobacteria | <i>Nostoc</i> sp. FACHB-106  | Changsha, China    | Detected DAB in culture                                                                                                                               |      |
| Cyanobacteria | <i>Nostoc</i> sp. FACHB-973  | Lake Donghu, China | Detected DAB in culture                                                                                                                               | [23] |
| Cyanobacteria | <i>Nostoc</i> 29150          | N. A               | Detected BMAA, AEG and DAB in culture                                                                                                                 | [36] |
| Cyanobacteria | <i>Nostoc</i>                | Kauai, Hawaii      | Detected BMAA in axenic culture. Strain isolated from roots of <i>C. micronesica</i> from National Tropical Botanical Garden (Kalaheo, Kauai, Hawaii) | [8]  |
| Cyanobacteria | <i>Nostoc</i> enc            | N. A               | Detected BMAA in culture. Isolated from symbiosis with <i>Encephalartos</i>                                                                           | [11] |
| Cyanobacteria | <i>Nostoc</i> 8001           | N. A               | Detected BMAA in culture. Isolated from symbiosis with <i>Gunnera monoica</i>                                                                         |      |
| Cyanobacteria | <i>Nostoc</i> 8963           | N. A               | Detected BMAA in culture. Isolated from symbiosis with <i>Gunnera prorepens</i>                                                                       |      |
| Cyanobacteria | <i>Nostoc</i> 8964           | N. A               | Detected BMAA in culture. Isolated from symbiosis with <i>Gunnera macrophylla</i>                                                                     |      |

|               |                                                  |                                |                                                                       |      |
|---------------|--------------------------------------------------|--------------------------------|-----------------------------------------------------------------------|------|
| Cyanobacteria | <i>Nostoc</i> sp. CMMED 01                       | Hawaiian Islands               | Detected BMAA in culture. Isolated from marine habitat                |      |
| Cyanobacteria | <i>Nostoc</i> 268                                | Baltic Sea                     | Detected BMAA in culture. Isolated from brackish Water                |      |
| Cyanobacteria | <i>Nostoc</i> CCMP 2511                          | N. A                           | Detected DAB in culture                                               | [29] |
| Cyanobacteria | <i>Nostoc endophytum</i> CCAP1453/14             | N. A                           | Detected DAB in culture                                               |      |
| Cyanobacteria | <i>Nostoc</i> sp.                                | River estuarie, Portugal       | Detected BMAA in culture                                              | [30] |
| Cyanobacteria | <i>Nostoc</i> sp. LEGE06077                      | River estuarie Minho, Portugal | Detected BMAA in culture                                              | [31] |
| Cyanobacteria | <i>Nostoc</i> sp.                                | Guam                           | Detected AEG. Cultured cycad root endosymbiont                        | [26] |
| Cyanobacteria | <i>Nodularia</i> sp. PCC 73104                   | British Columbia, Canada       | Detected AEG in axenic culture. Isolated from terrestrial environment |      |
| Cyanobacteria | <i>Nodularia spumigena</i> Huebel 1988/306       | Germany                        | Detected DAB in culture                                               | [14] |
| Cyanobacteria | <i>Nodularia harveyana</i> Huebel 1983/300       | Germany                        | Detected DAB in culture                                               |      |
| Cyanobacteria | <i>Nodularia spumigena</i> NSGG0205              | Poland                         | Detected DAB in culture                                               |      |
| Cyanobacteria | <i>Nodularia spumigena</i>                       | Baltic Sea                     | Detected BMAA in culture. Isolated from brackish water                | [11] |
| Cyanobacteria | <i>Nodularia harveyana</i> CCAP 14521            | N. A                           | Detected BMAA in culture. Isolated from marine habitat                |      |
| Cyanobacteria | <i>Nodularia</i> sp.                             | River estuarie, Portugal       | Detected BMAA in culture                                              | [30] |
| Cyanobacteria | <i>Nodularia</i> sp. LEGE06071                   | River estuarie Vouga, Portugal | Detected BMAA in culture                                              | [31] |
| Cyanobacteria | <i>Oscillatoria</i> sp. PCC 6506                 | N. A                           | Detected AEG in culture                                               | [26] |
| Cyanobacteria | <i>Phormidium</i>                                | N. A                           | Detected BMAA in culture. N.A habitat                                 | [11] |
| Cyanobacteria | <i>Phormidium</i> sp.                            | River estuarie, Portugal       | Detected BMAA in culture                                              | [30] |
| Cyanobacteria | <i>Phormidium</i> cf. <i>animale</i> LEGE06072   | River estuarie Vouga, Portugal | Detected BMAA in culture                                              | [31] |
| Cyanobacteria | <i>Phormidium</i> cf. <i>chalybeum</i> LEGE06078 | River estuarie Douro, Portugal | Detected BMAA in culture                                              |      |
| Cyanobacteria | <i>Planktothrix agardhii</i> NIES 595            | Northern Ireland               | Detected BMAA in culture. Isolated from freshwater habitat            | [11] |

|               |                                                  |                                |                                                                    |      |
|---------------|--------------------------------------------------|--------------------------------|--------------------------------------------------------------------|------|
| Cyanobacteria | <i>Planktothrix agardhii</i> FACHB-1243          | Lake Chaohu, China             | Detected DAB in culture                                            | [23] |
| Cyanobacteria | <i>Planktothrix agardhii</i> , FACHB-1261        | Lake Taihu, China              | Detected DAB in culture                                            |      |
| Cyanobacteria | <i>Plectonema</i> PCC 73110                      | N. A                           | Detected BMAA in culture. N.A habitat                              | [11] |
| Cyanobacteria | <i>Prochlorococcus marinus</i> CCMP1377          | Sargasso Sea                   | Detected BMAA in culture. Isolated from marine habitat             |      |
| Cyanobacteria | <i>Symploca</i> PCC 8002                         | N. A                           | Detected DAB in culture                                            | [29] |
| Cyanobacteria | <i>Symploca</i> PCC 8002                         | UK                             | Detected BMAA in culture. Isolated from marine, intertidal habitat | [11] |
| Cyanobacteria | <i>Scytonema</i> PCC 7110                        | Bermuda                        | Detected BMAA in culture. Isolated from limestone cave             |      |
| Cyanobacteria | <i>Scytonema</i> sp. FACHB-626                   | China                          | Detected DAB in culture                                            | [23] |
| Cyanobacteria | <i>Synechococcus</i> sp. TES 206V                | Thau lagoon, France            | Detected DAB in culture                                            | [10] |
| Cyanobacteria | <i>Synechococcus</i> sp. TES 206R                | Thau lagoon, France            | Detected DAB in culture                                            |      |
| Cyanobacteria | <i>Synechococcus</i> sp. TES 206H6               | Thau lagoon, France            | Detected DAB in culture                                            |      |
| Cyanobacteria | <i>Synechococcus</i> sp. TES 206D8               | Thau lagoon, France            | Detected DAB in culture                                            |      |
| Cyanobacteria | <i>Synechococcus elongatus</i> CCAP1479/1B       | N. A                           | Detected DAB in culture                                            | [29] |
| Cyanobacteria | <i>Synechococcus</i> sp. FACHB-1061              | Changjiang River, China        | Detected DAB in culture                                            | [23] |
| Cyanobacteria | <i>Synechococcus</i> sp.                         | River estuarie, Portugal       | Detected BMAA in culture                                           | [30] |
| Cyanobacteria | <i>Synechococcus</i> sp. LEGE07074               | River estuarie Douro, Portugal | Detected BMAA in culture                                           | [31] |
| Cyanobacteria | <i>Synechococcus</i> PCC 6301                    | U.S. A                         | Detected BMAA in culture. Isolated from freshwater habitat         | [11] |
| Cyanobacteria | <i>Synechocystis</i> sp. CC 6803                 | California, USA                | Detected AEG in axenic culture. Isolated from freshwater habitat   | [26] |
| Cyanobacteria | <i>Synechocystis</i> sp.                         | River estuarie, Portugal       | Detected BMAA in culture                                           | [30] |
| Cyanobacteria | <i>Synechocystis salina</i> LEGE06079            | River estuarie Douro, Portugal | Detected BMAA in culture                                           | [31] |
| Cyanobacteria | <i>Synechocystis</i> cf. <i>salina</i> LEGE06083 | River estuarie Douro, Portugal | Detected BMAA in culture                                           |      |
| Cyanobacteria | <i>Synechocystis</i> cf. <i>salina</i> LEGE07073 | River estuarie Vouga, Portugal | Detected BMAA in culture                                           |      |

|                                 |                                                                                   |                                  |                                                                                                     |      |
|---------------------------------|-----------------------------------------------------------------------------------|----------------------------------|-----------------------------------------------------------------------------------------------------|------|
| Cyanobacteria                   | <i>Trichodesmium thiebautii</i>                                                   | Caribbean                        | Detected BMAA in culture. Isolated from marine habitat                                              | [11] |
| Cyanobacteria                   | <i>Trichodesmium</i> CCMP1985                                                     | coastal North Carolina           | Detected BMAA in culture. Isolated from marine habitat                                              |      |
| Cyanobacteria                   | N.A strain                                                                        | Kauai, Hawaii                    | Detected BMAA in culture. Strain isolated from infected coralloid roots of <i>Cycas micronesica</i> | [41] |
| Cyanobacteria-diatoms           | planktonic field samples dominated by <i>Leptolyngbya</i> sp./ <i>Naviculales</i> | Kristineberg, Swedish west coast | marine, planktonic field samples                                                                    | [33] |
| Cyanobacteria based supplements | <i>Aphanizomenon flos-aquae</i> capsules                                          | Lake Klamath, OR, USA            | Detected DAB in one supplement                                                                      | [14] |
| Cyanobacteria based supplements | <i>Aphanizomenon flos aquae</i> dietary supplements                               | N. A                             | Detected BMAA                                                                                       | [46] |
| Cyanobacteria based supplements | <i>Aphanizomenon flos aquae</i> dietary supplements                               | Klamath Lake, USA                | Detected BMAA                                                                                       |      |
| Cyanobacteria based supplements | <i>Spirulina</i> containing supplements (10 supplements)                          | N. A                             | Detected AEG in 9 supplements, detected DAB in ten supplements. Analyzed 10 supplements             | [45] |
| Cyanobacteria based supplements | <i>Spirulina</i> containing natural health products                               | Canada                           | Detected BMAA in 4 supplements, detected DAB and AEG in 5 supplements                               | [19] |
| Cyanobacteria based supplements | <i>Spirulina</i> powder from commercial raw ingredient producers                  | N. A                             | Detected BMAA, DAB and AEG                                                                          | [36] |
| Biocrusts                       | Cyanobacterial biocrusts                                                          | Al Dawodiyu, Qatar               | Detected BMAA                                                                                       | [48] |
| Biocrusts                       | Cyanobacterial biocrusts                                                          | Al Dawodyu, Qatar                | Detected DAB and AEG                                                                                | [49] |

|           |                                             |                               |                                                                          |      |
|-----------|---------------------------------------------|-------------------------------|--------------------------------------------------------------------------|------|
| Biocrusts | Cyanobacterial biocrusts                    | Al Kharrara, Qatar            | Detected BMAA, DAB and AEG                                               |      |
| Biocrusts | Cyanobacterial biocrusts                    | Al Kharrara, Qatar            | Detected DAB and AEG                                                     | [50] |
| Biocrusts | Biocrusts                                   | Al Kharrara, Qatar            | Detected BMAA, DAB and AEG                                               | [47] |
| Aerosol   | Air-filters from the lake shore             | Lake Mascoma, USA             | Detected BMAA, DAB and AEG                                               | [51] |
| Aerosol   | Air-filters from the lake shore             | Goose Pond, USA               | Detected DAB                                                             |      |
| Diatoms   | <i>Achnanthes</i> sp. CCAP 1095/1           | Millport, Scotland            | Detected BMAA in axenic culture. Isolated from marine habitat            | [33] |
| Diatoms   | <i>Aulacoseira</i>                          | Nepean River, Australia       | Detected BMAA, AEG and DAB in cultures. Isolated from freshwater habitat | [55] |
| Diatoms   | <i>Asterionellopsis glacialis</i> CCMP 139  | N. A                          | Detected DAB and AEG in culture                                          | [54] |
| Diatoms   | <i>Chaetoceros calcitrans</i>               | N. A                          | Detected BMAA and DAB in culture                                         | [10] |
| Diatoms   | <i>Chaetoceros</i> sp.                      | Argenton, France              | Detected BMAA and DAB in culture                                         |      |
| Diatoms   | <i>Chaetoceros pumilum</i>                  | Argenton, France              | Detected DAB in culture                                                  |      |
| Diatoms   | <i>Chaetoceros calcitrans</i> CCMP 1315     | N. A                          | Detected BMAA and DAB in non-axenic culture                              | [56] |
| Diatoms   | <i>Chaetoceros</i> sp.                      | Argenton, France              | Detected BMAA and DAB in non-axenic culture                              |      |
| Diatoms   | <i>Cyclotella</i>                           | Lake Liddell, Australia       | Detected BMAA and DAB in cultures. Isolated from freshwater              | [55] |
| Diatoms   | <i>Fragilaria</i>                           | Murrumbidgee River, Australia | Detected AEG and DAB in cultures. Isolated from freshwater habitat       |      |
| Diatoms   | <i>Halamphora coffeaeformis</i> CCAP 1001/2 | N. A                          | Detected DAB and AEG in culture                                          | [54] |
| Diatoms   | <i>Navicula</i>                             | Lostock Dam, Australia        | Detected BMAA, AEG and DAB in cultures. Isolated from freshwater habitat | [55] |
| Diatoms   | <i>Navicula pelliculosa</i> CCAP 1050/9     | Massachusetts, USA            | Detected BMAA in axenic culture. Isolated from marine habitat            | [33] |
| Diatoms   | <i>Odontella aurita</i> AC 815              | N. A                          | Detected DAB and AEG in culture                                          | [54] |
| Diatoms   | <i>Pseudo-nitzschia delicatissima</i>       | France                        | Detected DAB in culture                                                  |      |

|                 |                                              |                           |                                                                          |      |
|-----------------|----------------------------------------------|---------------------------|--------------------------------------------------------------------------|------|
| Diatoms         | <i>Phaeodactylum tricornutum</i>             | N. A                      | Detected BMAA and DAB in culture                                         | [10] |
| Diatoms         | <i>Phaeodactylum tricornutum</i> CCAP 1055/1 | N. A                      | Detected BMAA and DAB in non-axenic and axenic cultures                  | [56] |
| Diatoms         | <i>Proboscia inermis</i> CCAP 1064/1         | Brandsfield Strait        | Detected BMAA in axenic culture. Isolated from marine habitat            | [33] |
| Diatoms         | <i>Skeletonema marinoi</i> SAAE08603         | Gullmarsfjorden, Sweden   | Detected BMAA in axenic culture. Isolated from marine habitat            |      |
| Diatoms         | <i>Skeletonema marinoi</i> ST28              | Stromstad, Sweden         | Detected BMAA in axenic culture. Isolated from marine habitat            |      |
| Diatoms         | <i>Skeletonema marinoi</i>                   | N. A                      | Detected DAB in culture                                                  | [10] |
| Diatoms         | <i>Skeletonema pseudocostatum</i>            | Bouin, France             | Detected DAB and AEG in culture                                          |      |
| Diatoms         | <i>Thalassiosira pseudonana</i> CCMP 1015    | N. A                      | Detected BMAA and DAB in non-axenic culture                              | [56] |
| Diatoms         | <i>Thalassiosira pseudonana</i>              | N. A                      | Detected BMAA and DAB in culture                                         | [10] |
| Diatoms         | <i>Thalassiosira weiss flogii</i>            | N. A                      | Detected DAB in culture                                                  |      |
| Diatoms         | <i>Thalassiosira</i> CCAP 1085/15            | Loch Linnhe, UK           | Detected BMAA in axenic culture. Isolated from marine habitat            | [33] |
| Diatoms         | <i>Tabellaria</i>                            | Spencers Creek, Australia | Detected BMAA, AEG and DAB in cultures. Isolated from freshwater habitat | [55] |
| Dinoflagellates | <i>Alexandrium catenella</i> C2-4            | Thau lagoon, France       | Detected DAB and AEG in culture                                          | [10] |
| Dinoflagellates | <i>Alexandrium catenella</i> C11-4           | Thau lagoon, France       | Detected DAB and AEG in culture                                          |      |
| Dinoflagellates | <i>Alexandrium minutum</i>                   | France                    | Detected DAB in culture                                                  | [54] |
| Dinoflagellates | <i>Gymnodinium catenatum</i>                 | Sesimbra, Portugal        | Detected BMAA, AEG and DAB in culture                                    | [57] |
| Dinoflagellates | <i>Heterocapsa triquetra</i>                 | France                    | Detected DAB in culture                                                  | [54] |
| Dinoflagellates | <i>Prorocentrum micans</i>                   | France                    | Detected DAB and AEG in culture                                          |      |
| Dinoflagellates | <i>Pyrocystis noctulica</i> CCMP 732         | N. A                      | Detected DAB and AEG in culture                                          |      |
| Dinoflagellates | <i>Scrippsiella trochoidea</i>               | France                    | Detected DAB in culture                                                  |      |
| Dinoflagellates | <i>Symbiodinium microadriaticum</i> CCMP 828 | N. A                      | Detected DAB in culture                                                  |      |
| Green algae     | <i>Dunaliella salina</i> CCAP 19/18          | N. A                      | Detected DAB in culture                                                  |      |
|                 |                                              |                           |                                                                          |      |

|             |                                           |                                      |                                 |      |
|-------------|-------------------------------------------|--------------------------------------|---------------------------------|------|
| Green algae | <i>Chlamydomonas reginae</i> CCAP 11/78   | N. A                                 | Detected DAB and AEG in culture |      |
| Green algae | <i>Chlorella vulgaris</i> CCAP 211/25     | N. A                                 | Detected DAB and AEG in culture |      |
| Green algae | <i>Ostreococcus tauri</i>                 | Thau lagoon, France                  | Detected DAB and AEG in culture |      |
| Euglenas    | <i>Eutreptiella gymnastica</i> CCMP 1594  | N. A                                 | Detected DAB in culture         |      |
| Red algae   | <i>Porphyridium purpureum</i> CCAP 1380/5 | N. A                                 | Detected DAB and AEG in culture |      |
| Haptophyta  | <i>Emiliana huxleyi</i> CCMP 371          | N. A                                 | Detected DAB in culture         |      |
| Haptophyta  | <i>Tisochrysis lutea</i> CCAP 927/14      | N. A                                 | Detected DAB in culture         | [10] |
| Cryptophyta | <i>Hemiselmis</i> sp. RCC 659             | N. A                                 | Detected DAB in culture         |      |
| Cryptophyta | <i>Proteomonas</i> sp. RCC 3072           | N. A                                 | Detected DAB in culture         |      |
| Cryptophyta | <i>Rhinomonas</i> sp. RCC 821             | N. A                                 | Detected DAB in culture         |      |
| Cryptophyta | <i>Rhodomonas salina</i> RCC 1506         | N. A                                 | Detected DAB in culture         |      |
| Cryptophyta | <i>Rhodomonas</i> sp. RCC 1978            | N. A                                 | Detected DAB in culture         |      |
| Cryptophyta | Unidentified <i>cryptophyceae</i>         | France                               | Detected DAB in culture         |      |
| Zooplankton | Zooplankton of the Baltic Sea             | Landsort Deep, Baltic Sea (open sea) | Detected BMAA                   | [44] |
| Zooplankton | Zooplankton samples of the Baltic Sea     | Baltic sea (open water)              | Detected BMAA                   | [9]  |
| Bivalves    | <i>Anodonta woodiana</i>                  | Gonghu Bay, Lake Taihu, China        | Detected BMAA                   | [34] |
| Bivalves    | <i>Antigona lamellaris</i>                | Beihai City, China                   | Detected DAB                    |      |
| Bivalves    | <i>Atrina pectinata</i>                   | Dalian City, China                   | Detected DAB                    | [59] |
| Bivalves    | <i>Arca inflata</i>                       | Lianyungang City, China              | Detected DAB                    |      |
| Bivalves    | <i>Arca inflata</i>                       | Qinhuangdao City, China              | Detected DAB                    |      |
| Bivalves    | <i>Cerastoderma edule</i>                 | Rio de Aveiro, Portugal              | Detected BMAA, DAB and AEG      | [57] |
| Bivalves    | <i>Cerastoderma edule</i>                 | Ria Formosa, Portugal                | Detected BMAA, DAB and AEG      |      |
| Bivalves    | <i>Chlamys farreri</i>                    | Rongcheng City, China                | Detected DAB                    |      |
| Bivalves    | <i>Chlamys farreri</i>                    | Dalian City, China                   | Detected DAB                    | [59] |
| Bivalves    | <i>Chlamys farreri</i>                    | Lianyungang City, China              | Detected DAB                    |      |
| Bivalves    | <i>Chlamys farreri</i>                    | Qingdao City, China                  | Detected DAB                    |      |
| Bivalves    | <i>Corbicula fluminea</i>                 | Gonghu Bay, Lake Taihu, China        | Detected BMAA                   | [34] |

|          |                                  |                                   |                                                  |      |
|----------|----------------------------------|-----------------------------------|--------------------------------------------------|------|
| Bivalves | <i>Crassostrea gigas</i>         | France                            | Detected BMAA in tissue, farmed sea-food         | [60] |
| Bivalves | <i>Crassostrea gigas</i>         | Thau lagoon, France               | Detected BMAA, DAB and AEG                       | [29] |
| Bivalves | <i>Crassostrea gigas</i>         | French coast, France              | Detected BMAA and DAB in digestive gland tissues | [54] |
| Bivalves | <i>Crassostrea virginica</i>     | Louisiana                         | Detected BMAA, Brackish habitat                  | [61] |
| Bivalves | <i>Crassostrea virginica</i>     | Mississippi                       | Detected BMAA, Brackish habitat                  |      |
| Bivalves | <i>Crassostrea</i> sp.           | Beihai City, China                | Detected DAB                                     | [59] |
| Bivalves | <i>Crassostrea</i> sp.           | Zhoushan City, China              | Detected DAB                                     |      |
| Bivalves | <i>Crassostrea</i> sp.           | Rongcheng City, China             | Detected DAB                                     |      |
| Bivalves | <i>Crassostrea</i> sp.           | Ningde City, China                | Detected DAB                                     |      |
| Bivalves | <i>Crassostrea</i> sp.           | Wenzhou City, China               | Detected DAB                                     |      |
| Bivalves | <i>Crassostrea</i> sp.           | Dalian City, China                | Detected DAB                                     |      |
| Bivalves | <i>Crassostrea</i> sp.           | Lianyungang City, China           | Detected DAB                                     |      |
| Bivalves | <i>Crassostrea</i> sp.           | Qinhuangdao City, China           | Detected DAB                                     |      |
| Bivalves | <i>Crassostrea</i> sp.           | Qingdao City, China               | Detected DAB                                     |      |
| Bivalves | <i>Gafrarium tumidum</i>         | Shenzhen City, China              | Detected DAB                                     |      |
| Bivalves | <i>Mactra chinensis</i>          | Rongcheng City, China             | Detected DAB                                     |      |
| Bivalves | <i>Mactra chinensis</i>          | Dalian City, China                | Detected DAB                                     |      |
| Bivalves | <i>Moerella iridescens</i>       | Wenzhou City, China               | Detected DAB                                     |      |
| Bivalves | <i>Mercenaria mercenaria</i>     | Lianyungang City, China           | Detected DAB                                     |      |
| Bivalves | <i>Mytilus edulis</i>            | Sweden (west coast)               | Detected BMAA in tissue, farmed sea-food         | [60] |
| Bivalves | <i>Mytilus edulis</i>            | Europe (Scandinavia)              | Detected BMAA                                    | [62] |
| Bivalves | <i>Mytilus edulis platensis</i>  | South America                     | Detected BMAA                                    |      |
| Bivalves | <i>Mytilus edulis</i>            | Kattegat Sea, Sweden (west coast) | Detected BMAA                                    | [9]  |
| Bivalves | <i>Mytilus edulis</i>            | French coast, France              | Detected BMAA and DAB in digestive gland tissues | [54] |
| Bivalves | <i>Mytilus galloprovincialis</i> | Thau lagoon, France               | Detected BMAA, DAB and AEG                       | [10] |
| Bivalves | <i>Mytilus galloprovincialis</i> | Thau lagoon, France               | Detected BMAA, DAB and AEG                       | [29] |
| Bivalves | <i>Mytilus galloprovincialis</i> | Zhoushan City, China              | Detected DAB                                     | [59] |



|          |                                  |                                   |                                                                      |      |
|----------|----------------------------------|-----------------------------------|----------------------------------------------------------------------|------|
| Bivalves | <i>Mytilus galloprovincialis</i> | Rongcheng City, China             | Detected DAB                                                         |      |
| Bivalves | <i>Mytilus galloprovincialis</i> | Ningde City, China                | Detected DAB                                                         |      |
| Bivalves | <i>Mytilus galloprovincialis</i> | Dalian City                       | Detected DAB                                                         |      |
| Bivalves | <i>Mytilus galloprovincialis</i> | Lianyungang City, China           | Detected DAB                                                         |      |
| Bivalves | <i>Mytilus galloprovincialis</i> | Qinhuangdao City, China           | Detected DAB                                                         |      |
| Bivalves | <i>Mytilus galloprovincialis</i> | Qingdao City, China               | Detected DAB                                                         |      |
| Bivalves | <i>Mytilus galloprovincialis</i> | French coast, France              | Detected BMAA and DAB in digestive gland tissues                     | [54] |
| Bivalves | <i>Mytilus coruscus</i>          | Zhoushan City, China              | Detected BMAA and DAB                                                |      |
| Bivalves | <i>Mytilus coruscus</i>          | Wenzhou City, China               | Detected DAB                                                         | [59] |
| Bivalves | <i>Ostrea edulis</i>             | Greece                            | Detected BMAA in tissue, farmed sea-food                             |      |
| Bivalves | <i>Ostrea edulis</i>             | Sweden (west coast)               | Detected BMAA in tissue, farmed sea-food                             | [60] |
| Bivalves | <i>Ostrea edulis</i>             | Kattegat Sea, Sweden (west coast) | Detected BMAA                                                        | [9]  |
| Bivalves | <i>Ostrea edulis</i>             | Stockholm, Sweden                 | Detected BMAA and DAB. Bought in a fish market in Stockholm, Sweden. | [27] |
| Bivalves | <i>Perna viridis</i>             | Beihai City, China                | Detected DAB                                                         |      |
| Bivalves | <i>Perna viridis</i>             | Shenzhen City, China              | Detected DAB                                                         | [59] |
| Bivalves | <i>Perna canaliculus</i>         | Australia                         | Detected BMAA                                                        | [62] |
| Bivalves | <i>Periglypta petechialis</i>    | Beihai City, China                | Detected DAB                                                         | [59] |
| Bivalves | <i>Placopecten magellanicus</i>  | North America                     | Detected BMAA                                                        | [62] |
| Bivalves | <i>Ruditapes philippinarum</i>   | Rongcheng City, China             | Detected DAB                                                         |      |
| Bivalves | <i>Ruditapes philippinarum</i>   | Ningde City                       | Detected DAB                                                         |      |
| Bivalves | <i>Ruditapes philippinarum</i>   | Dalian City, China                | Detected DAB                                                         |      |
| Bivalves | <i>Ruditapes philippinarum</i>   | Qingdao City, China               | Detected DAB                                                         |      |
| Bivalves | <i>Ruditapes philippinarum</i>   | Lianyungang City, China           | Detected DAB                                                         | [59] |
| Bivalves | <i>Solen strictus</i>            | Rongcheng City, China             | Detected BMAA                                                        |      |
| Bivalves | <i>Sinonovacula constricta</i>   | Ningde City, China                | Detected DAB                                                         |      |
| Bivalves | <i>Sinonovacula constricta</i>   | Wenzhou City, China               | Detected DAB                                                         |      |
| Bivalves | <i>Sinonovacula constricta</i>   | Lianyungang City, China           | Detected DAB                                                         |      |

|             |                                 |                               |                                                                                                                           |      |
|-------------|---------------------------------|-------------------------------|---------------------------------------------------------------------------------------------------------------------------|------|
| Bivalves    | <i>Scapharca subcrenata</i>     | Dalian City, China            | Detected DAB                                                                                                              |      |
| Bivalves    | <i>Tegillarca granosa</i>       | Wenzhou City, China           | Detected DAB                                                                                                              |      |
| Bivalves    | Mussel                          | West Coast, Sweden            | Detected BMAA                                                                                                             | [63] |
| Gastropods  | <i>Bellamyia aeruginosa</i>     | Gonghu Bay, Lake Taihu, China | Detected BMAA                                                                                                             | [34] |
| Gastropods  | <i>Volutharpa ampullacea</i>    | Dalian City, China            | Detected DAB                                                                                                              |      |
| Gastropods  | <i>Haliotis discus hannai</i>   | Ningde City, China            | Detected DAB                                                                                                              |      |
| Gastropods  | <i>Neverita didyma</i>          | Rongcheng City, China         | Detected BMAA and DAB                                                                                                     |      |
| Gastropods  | <i>Neverita didyma</i>          | Laizhou City, China           | Detected BMAA and DAB                                                                                                     |      |
| Gastropods  | <i>Neverita didyma</i>          | Qingdao City, China           | Detected BMAA and DAB                                                                                                     |      |
| Gastropods  | <i>Neverita didyma</i>          | Dalian City, China            | Detected BMAA and DAB                                                                                                     | [59] |
| Gastropods  | <i>Neverita didyma</i>          | Lianyungang City, China       | Detected BMAA and DAB                                                                                                     |      |
| Gastropods  | <i>Neptunea cumingii</i>        | Dalian City, China            | Detected DAB                                                                                                              |      |
| Gastropods  | <i>Natica maculosa</i>          | Ningde City, China            | Detected DAB                                                                                                              |      |
| Gastropods  | <i>Rapana venosa</i>            | Qinhuangdao City, China       | Detected DAB                                                                                                              |      |
| Gastropods  | <i>Rapana venosa</i>            | Qingdao City, China           | Detected DAB                                                                                                              |      |
| Crustaceans | <i>Callinectes sapidus</i>      | Florida                       | Detected BMAA, Marine habitat                                                                                             | [61] |
| Crustaceans | <i>Cancer pagurus</i>           | Ireland, Northeast Atlantic   | Detected BMAA                                                                                                             | [62] |
| Crustaceans | <i>Callinectes sapidus</i>      | Chesapeake Bay, USA           | Detected BMAA and DAB in claws, swimming muscle, hepatopancreas and hepatopancreas under heart. DAB detected in the heart | [64] |
| Crustaceans | <i>Callinectes sapidus</i>      | Chesapeake Bay, USA           | Detected BMAA, DAB and AEG                                                                                                | [36] |
| Crustaceans | <i>Eriocheir sisensis</i>       | Gonghu Bay, Lake Taihu, China | Detected BMAA                                                                                                             | [34] |
| Crustaceans | <i>Heterocarpus ensifer</i>     | Sweden                        | Detected BMAA in tissue. Bought sea-food                                                                                  | [60] |
| Crustaceans | <i>Heterocarpus ensifer</i>     | Northern Atlantic             | Detected BMAA in tissue. Bought sea-food                                                                                  |      |
| Crustaceans | <i>Macrobrachium nipponense</i> | Gonghu Bay, Lake Taihu, China | Detected BMAA                                                                                                             | [34] |

|             |                                  |                                         |                                                                 |      |
|-------------|----------------------------------|-----------------------------------------|-----------------------------------------------------------------|------|
| Crustaceans | <i>Mysis mixta</i>               | Landsort Deep, Baltic Sea<br>(open sea) | Detected BMAA                                                   | [44] |
| Crustaceans | <i>Neomysis integer</i>          | Landsort Deep, Baltic Sea<br>(open sea) | Detected BMAA                                                   |      |
| Crustaceans | <i>Palaemon modestus</i> Heller  | Gonghu Bay, Lake Taihu,<br>China        | Detected BMAA                                                   | [34] |
| Crustaceans | <i>Procambarus clarkii</i>       | Gonghu Bay, Lake Taihu,<br>China        | Detected BMAA                                                   |      |
| Crustaceans | <i>Panulirus</i> sp.             | Florida                                 | Detected BMAA and DAB in lobsters'<br>tails                     | [65] |
| Fish        | <i>Abramis brama</i>             | Lake Finjasjön, Sweden                  | Detected BMAA in brain and muscle                               | [40] |
| Fish        | <i>Aristichthys nobilis</i>      | Gonghu Bay, Lake Taihu,<br>China        | Detected BMAA                                                   | [34] |
| Fish        | <i>Anguilla anguilla</i>         | Lake Finjasjön, Sweden                  | Detected BMAA in brain                                          | [40] |
| Fish        | <i>Carassius auratus</i>         | Gonghu Bay, Lake Taihu,<br>China        | Detected BMAA                                                   | [34] |
| Fish        | <i>Carcharhinus acronotus</i>    | Biscayne Bay, South Florida             | Detected BMAA in shark fins                                     | [66] |
| Fish        | <i>Carcharhinus acronotus</i>    | Atlantic Ocean                          | Detected BMAA in shark fins                                     | [37] |
| Fish        | <i>Carcharhinus limbatus</i>     | Biscayne Bay, South Florida             | Detected BMAA in shark fins                                     | [66] |
| Fish        | <i>Carcharhinus limbatus</i>     | Florida Bay, South Florida              | Detected BMAA in shark fins                                     |      |
| Fish        | <i>Carcharhinus limbatus</i>     | Atlantic Ocean                          | Detected BMAA in shark fins                                     | [67] |
| Fish        | <i>Carcharhinus leucas</i>       | Florida Bay, South Florida              | Detected BMAA in shark fins                                     | [66] |
| Fish        | <i>Carcharhinus leucas</i>       | Atlantic Ocean                          | Detected BMAA in shark fins                                     | [67] |
| Fish        | <i>Coregonus lavaretus</i>       | Stockholm, Sweden                       | Detected BMAA. Bought in a fish market<br>in Stockholm, Sweden. | [27] |
| Fish        | <i>Coregonus lavaretus</i>       | Baltic sea                              | Detected BMAA in muscle and brain tis-<br>sues                  | [9]  |
| Fish        | <i>Coilia ectenes taihuensis</i> | Gonghu Bay, Lake Taihu,<br>China        | Detected BMAA                                                   | [34] |
| Fish        | <i>Clupea harengus</i>           | Baltic sea                              | Detected BMAA in tissue. Bought sea-<br>food                    | [60] |

|      |                                    |                               |                                                                 |      |
|------|------------------------------------|-------------------------------|-----------------------------------------------------------------|------|
| Fish | <i>Clupea harengus</i>             | Baltic sea                    | Detected BMAA in muscle and brain tissues                       | [9]  |
| Fish | <i>Cyprinus carpio</i>             | Gonghu Bay, Lake Taihu, China | Detected BMAA                                                   | [34] |
| Fish | <i>Cyprinus carpio</i>             | Lake Mascoma, USA             | Detected BMAA in brain, liver and muscle, detected DAB in brain | [51] |
| Fish | <i>Erythroculter ilishaeformis</i> | Gonghu Bay, Lake Taihu, China | Detected BMAA                                                   | [34] |
| Fish | <i>Esox lucius</i>                 | Lake Finjasjön, Sweden        | Detected BMAA in brain and muscle                               | [40] |
| Fish | <i>Ginglymostoma cirratum</i>      | Biscayne Bay, South Florida   | Detected BMAA in shark fins                                     | [66] |
| Fish | <i>Ginglymostoma cirratum</i>      | Florida Bay, South Florida    | Detected BMAA in shark fins                                     |      |
| Fish | <i>Ginglymostoma cirratum</i>      | Atlantic Ocean                | Detected BMAA in shark fins                                     | [67] |
| Fish | <i>Gymnocephalus cernua</i>        | Lake Finjasjön, Sweden        | Detected BMAA in brain and muscle                               | [40] |
| Fish | <i>Galeocerdo cuvier</i>           | Pacific Ocean                 | Detected BMAA in shark fins                                     | [67] |
| Fish | <i>Hemiramphus kurumeus</i>        | Gonghu Bay, Lake Taihu, China | Detected BMAA                                                   | [34] |
| Fish | <i>Hypophthalmichthys molitrix</i> | Gonghu Bay, Lake Taihu, China | Detected BMAA                                                   |      |
| Fish | <i>Neosalanx taihuensis</i>        | Gonghu Bay, Lake Taihu, China | Detected BMAA                                                   |      |
| Fish | <i>Negaprion brevirostris</i>      | Florida Bay, South Florida    | Detected BMAA in shark fins                                     | [66] |
| Fish | <i>Negaprion brevirostris</i>      | Atlantic Ocean                | Detected BMAA in shark fins                                     | [67] |
| Fish | <i>Osmerus eperlanus</i>           | Baltic sea                    | Detected BMAA in muscle and brain tissues                       | [9]  |
| Fish | <i>Parabramis pekinensis</i>       | Gonghu Bay, Lake Taihu, China | Detected BMAA                                                   | [34] |
| Fish | <i>Pelteobagrus fulvidraco</i>     | Gonghu Bay, Lake Taihu, China | Detected BMAA                                                   |      |
| Fish | <i>Parasilurus asotus</i>          | Gonghu Bay, Lake Taihu, China | Detected BMAA                                                   |      |
| Fish | <i>Perca fluviatilis</i>           | Lake Finjasjön, Sweden        | Detected BMAA in brain and muscle                               | [40] |

|      |                                   |                               |                                                    |      |
|------|-----------------------------------|-------------------------------|----------------------------------------------------|------|
| Fish | <i>Pleuronectes platessa</i>      | Northeast Atlantic            | Detected BMAA in tissue. Bought sea-food           | [60] |
| Fish | <i>Pleuronectes platessa</i>      | Baltic sea                    | Detected BMAA in tissue. Bought sea-food           |      |
| Fish | <i>Protosalanx hyalocranius</i>   | Gonghu Bay, Lake Taihu, China | Detected BMAA                                      | [34] |
| Fish | <i>Pseudorasbora parva</i>        | Gonghu Bay, Lake Taihu, China | Detected BMAA                                      |      |
| Fish | <i>Rutilus rutilus</i>            | Lake Finjasjön, Sweden        | Detected BMAA in brain and muscle                  |      |
| Fish | <i>Rhodeus sinensis</i>           | Gonghu Bay, Lake Taihu, China | Detected BMAA                                      |      |
| Fish | <i>Rhizoprionodon terraenovae</i> | Atlantic Ocean                | Detected BMAA in shark fins                        | [67] |
| Fish | <i>Sander lucioperca</i>          | Lake Finjasjön, Sweden        | Detected BMAA in brain and muscle                  | [40] |
| Fish | <i>Salvelinus alpinus</i>         | Sweden                        | Detected BMAA in tissue. Farmed sea-food           | [60] |
| Fish | <i>Scophthalmus maximus</i>       | Baltic sea                    | Detected BMAA in muscle and brain tissues          | [9]  |
| Fish | <i>Sphyrna tiburo</i>             | Florida Bay, South Florida    | Detected BMAA in shark fins                        | [66] |
| Fish | <i>Sphyrna tiburo</i>             | Atlantic Ocean                | Detected BMAA in shark fins                        | [67] |
| Fish | <i>Sphyrna mokarran</i>           | Biscayne Bay, South Florida   | Detected BMAA in shark fins, kidney, liver, muscle | [66] |
| Fish | <i>Sphyrna mokarran</i>           | Florida Bay, South Florida    | Detected BMAA in shark fins, kidney, liver, muscle |      |
| Fish | <i>Sphyrna mokarran</i>           | Atlantic Ocean                | Detected BMAA in shark fins                        | [67] |
| Fish | <i>Sphyrna zygaena</i>            | Atlantic Ocean                | Detected BMAA in shark fins                        |      |
| Fish | <i>Tinca tinca</i>                | Lake Finjasjön, Sweden        | Detected BMAA in brain and muscle                  | [40] |
| Fish | <i>Trigloporus quadricornis</i>   | Baltic sea                    | Detected BMAA in brain tissue                      | [9]  |
| Fish | Carp                              | Kirkman's Cove, Nebraska      | Detected BMAA and DAB                              | [38] |
| Fish | Carp                              | Rockford, Nebraska            | Detected BMAA and DAB                              |      |
| Fish | Carp                              | Swan Creek, Nebraska          | Detected BMAA and DAB                              |      |
| Fish | Carp                              | Willow Creek, Nebraska        | Detected BMAA and DAB                              |      |
| Fish | White crappie                     | Kirkman's Cove, Nebraska      | Detected BMAA                                      |      |

|                                |                            |                             |                                                                                                        |      |
|--------------------------------|----------------------------|-----------------------------|--------------------------------------------------------------------------------------------------------|------|
| Fish                           | White crappie              | Pawnee, Nebraska            | Detected BMAA and DAB                                                                                  |      |
| Fish                           | White crappie              | Rockford, Nebraska          | Detected BMAA and DAB                                                                                  |      |
| Fish                           | Bass                       | Pawnee, Nebraska            | Detected BMAA and DAB                                                                                  |      |
| Fish                           | Bass                       | Rockford, Nebraska          | Detected BMAA and DAB                                                                                  |      |
| Fish                           | Bass                       | Willow Creek, Nebraska      | Detected BMAA                                                                                          |      |
| Fish                           | Shad                       | Pawnee, Nebraska            | Detected BMAA and DAB                                                                                  |      |
| Fish                           | Walleye                    | Pawnee, Nebraska            | Detected BMAA and DAB                                                                                  |      |
| Fish                           | Walleye                    | Rockford, Nebraska          | Detected BMAA and DAB                                                                                  |      |
| Fish                           | White crappie              | Pawnee, Nebraska            | Detected BMAA and DAB                                                                                  |      |
| Fish                           | Catfish                    | Rockford, Nebraska          | Detected BMAA and DAB                                                                                  |      |
| Fish                           | Wiper                      | Swan Creek, Nebraska        | Detected BMAA                                                                                          |      |
| Fish                           | Bluegill                   | Willow Creek, Nebraska      | Detected BMAA                                                                                          |      |
| Fish based dietary supplements | Shark cartilage powders    | N.A                         | Detected BMAA (in 15 products/16), DAB and AEG (in all 16). Analyzed 16 products from 7 manufacturers. | [68] |
| Mammals                        | Flying Foxes               | Guam, Hawaii                | Detected BMAA                                                                                          | [69] |
| Mammals                        | Flying Foxes               | Guam, Hawaii                | Detected BMAA in hair and wing membrane                                                                | [41] |
| Mammals                        | Patients died from ALS-PDC | Guam, Hawaii                | Detected BMAA brain tissues                                                                            | [8]  |
| Mammals                        | Patients died from ALS     | USA                         | Detected BMAA in human brain tissues                                                                   | [71] |
| Mammals                        | Patients died from AD      | Canada                      | Detected BMAA brain tissues                                                                            | [8]  |
| Mammals                        | Patients died from AD      | USA                         | Detected BMAA in human brain tissues                                                                   | [71] |
| Mammals                        | Patients with AD           | Canada                      | Detected BMAA in brain tissues                                                                         | [41] |
| Mammals                        | Human hair                 | Hartbeespoort, South Africa | Detected BMAA                                                                                          | [72] |
| Mammals                        | Dolphins                   | Florida                     | Detected BMAA in brains in 6 of 7 dolphins                                                             | [70] |
| Mammals                        | Dolphins                   | Massachusetts               | Detected BMAA in brains in 7 of 7 dolphins                                                             |      |

|        |                                                         |                                                            |                                                                                                                                            |      |
|--------|---------------------------------------------------------|------------------------------------------------------------|--------------------------------------------------------------------------------------------------------------------------------------------|------|
| Plants | <i>Azolla filiculoides</i>                              | Kauai, Hawaii                                              | Detected BMAA                                                                                                                              | [8]  |
| Plants | <i>Brassica oleracea</i>                                | N. A                                                       | Detected DAB                                                                                                                               | [27] |
| Plants | <i>Cycas debaoensis</i>                                 | Jurassic Plants Nursery<br>(Halfmoon Bay, BC), Can-<br>ada | Detected BMAA, AEG and DAB in<br>leaves                                                                                                    | [45] |
| Plants | <i>Cycas micronesica</i>                                | Village Yigo, Guam                                         | Detected BMAA in seeds                                                                                                                     | [73] |
| Plants | <i>Cycas micronesica</i>                                | Montgomery Botanical<br>Centre, Miami, US                  | Detected BMAA in seeds                                                                                                                     | [28] |
| Plants | <i>Cycas micronesica</i>                                | Kauai, Hawai                                               | Detected BMAA in roots, leaf tissue, the<br>outer seed layer, the seed sarcotesta, and<br>female gametophyte                               | [41] |
| Plants | <i>Cycas micronesica</i>                                | Kauai, Hawaii                                              | Detected BMAA in seeds and root                                                                                                            | [8]  |
| Plants | <i>Cycas revoluta</i>                                   | Stockholm, Sweden                                          | Detected BMAA in seeds                                                                                                                     | [27] |
| Plants | <i>Cycas revoluta</i> (seeds)                           | Asia                                                       | Detected BMAA and DAB. Purchased<br>from Fesaja-Versand (Schönhagen, Ger-<br>many)                                                        | [14] |
| Plants | <i>Cycas revoluta</i>                                   | N. A                                                       | Detected BMAA in root, stem, and<br>leaves. Detected DAB in root. Cycad<br>plant was purchased from a flower mar-<br>ket in Qingdao, China | [23] |
| Plants | <i>Gunnera kauaiensi</i>                                | Kauai, Hawaii                                              | Detected BMAA                                                                                                                              | [8]  |
| Plants | <i>Lathyrus latifolius</i> (seeds)                      | Germany                                                    | Detected DAB. Purched from Kiepenkerl<br>(Norken, Germany)                                                                                 | [14] |
| Plants | Flour prepared from the gameto-<br>phyte of cycad seeds | Guam                                                       | Detected BMAA                                                                                                                              | [41] |
| Plants | Aquatic plants                                          | Holmes, Nebraska                                           | Detected BMAA and DAB                                                                                                                      | [38] |
| Plants | Aquatic plants                                          | Kirkman's Cove, Nebraska                                   | Detected BMAA and DAB                                                                                                                      |      |
| Plants | Aquatic plants                                          | Pawnee, Nebraska                                           | Detected BMAA and DAB                                                                                                                      |      |
| Plants | Aquatic plants                                          | Rockford, Nebraska                                         | Detected BMAA and DAB                                                                                                                      |      |

---

|        |                |                        |                       |
|--------|----------------|------------------------|-----------------------|
| Plants | Aquatic plants | Swan Creek, Nebraska   | Detected BMAA and DAB |
| Plants | Aquatic plants | Willow Creek, Nebraska | Detected BMAA and DAB |

---
